# Supplementary material for: Premature aging and cancer development in transgenic mice lacking functional CYLD
Source: publisher site journal article supplement (doi:10.18632/aging.101732), 2019-01-10
Supplement: Supplementary file [file aging-v11i1-101732-supplementary-material-SD1.pdf]

SUPPLEMENTARY MATERIAL

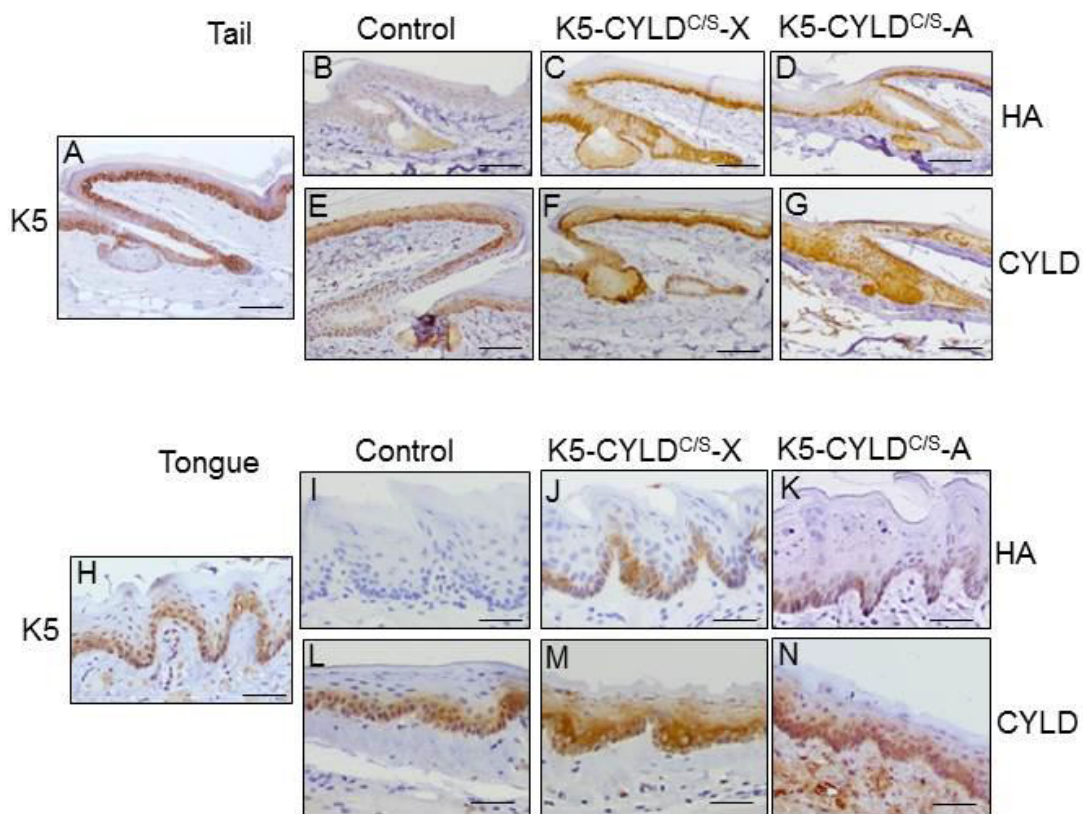

**Figure S1. Analysis of the transgene expression in tail skin and tongue.** (A) Representative staining of K5 in the skin of a control mouse. (B-D) HA and (E-G) CYLD expression in the tail skin of Control and transgenic mice. Observe that HA is not detected in Control sections (B), while HA expression in the tail of K5-CYLD<sup>C/S</sup> mice follows the K5 expression pattern (C-D). (H) Representative sections showing the expression of K5 in the tongue of a control mouse. (I-K) HA and (L-N) CYLD expression in the tongue of Control and transgenic mice. HA is not expressed in the tongue of Control mice (I), while HA expression in the tongue of transgenic mice follows the K5 expression pattern in control mice (J, K). Sections correspond to 1-month-old mice. Scale bars: (A-D) 220  $\mu$ m; (E-G) 200  $\mu$ m; (H, J, K); 180  $\mu$ m; (I, L-N) 160  $\mu$ m.

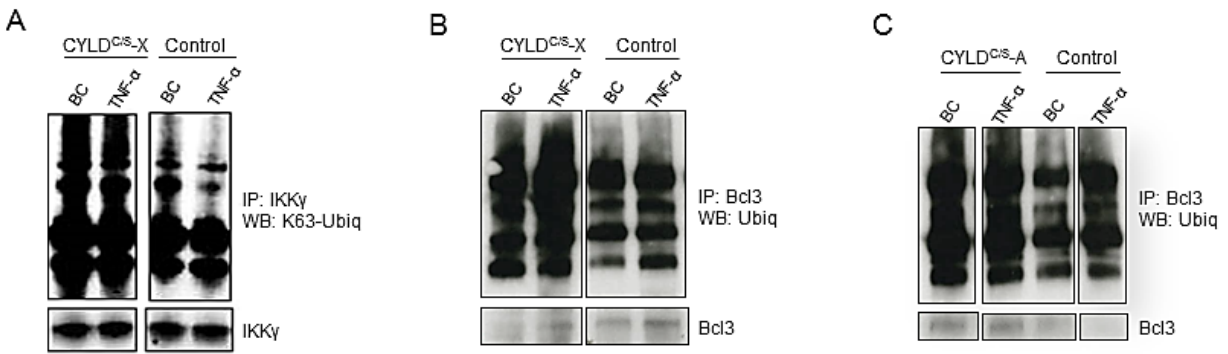

**Figure S2. Lack of CYLD DUB function in the K5-CYLD<sup>C/s</sup> mice.** Functional analysis of the CYLD<sup>C/s</sup> transgene, by IP of back skin protein extracts with an IKKγ or Bcl3 specific antibodies, in the presence and absence of TNF-α. Western blots using Ubiquitin and IKKγ specific antibodies are shown. **(A)** Observe the lack of DUB function in transgenic mice checked as elevated levels of polyubiquitinated IKKγ in both the basal condition (BC) and after TNF-α treatment. **(B, C)** Observe the increased levels of ubiquitinated Bcl3 in the back skin of transgenic mice in both states: without TNF-α stimulation (BC, basal condition), and after TNF-α treatment. Similar results were obtained for both K5-CYLD<sup>C/s-X</sup> **(B)** and K5-CYLD<sup>C/s-A</sup> **(C)** mice. BC: basal condition, i.e., without TNF-α stimulation. **(A, B)** when indicated, cells were incubated for 15 min with TNF-α treatment; **(C)** when indicated cells were incubated 40 min with TNF-α.

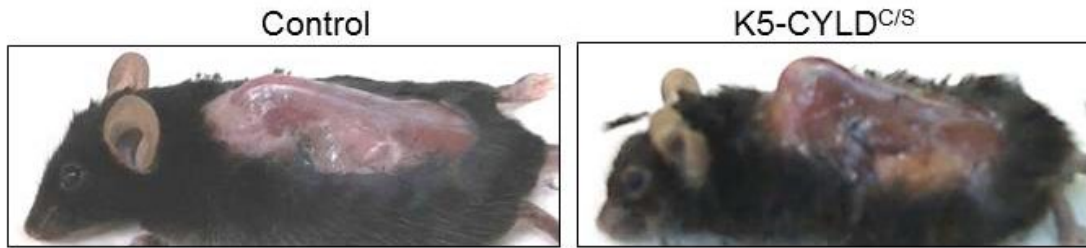

**Figure S3. External phenotype of the K5-CYLD<sup>C/S</sup> mice.** Representative image showing kyphosis in the back of a transgenic mouse. Both Control and K5-CYLD<sup>C/S</sup> mice are littermates of 11 months-old.

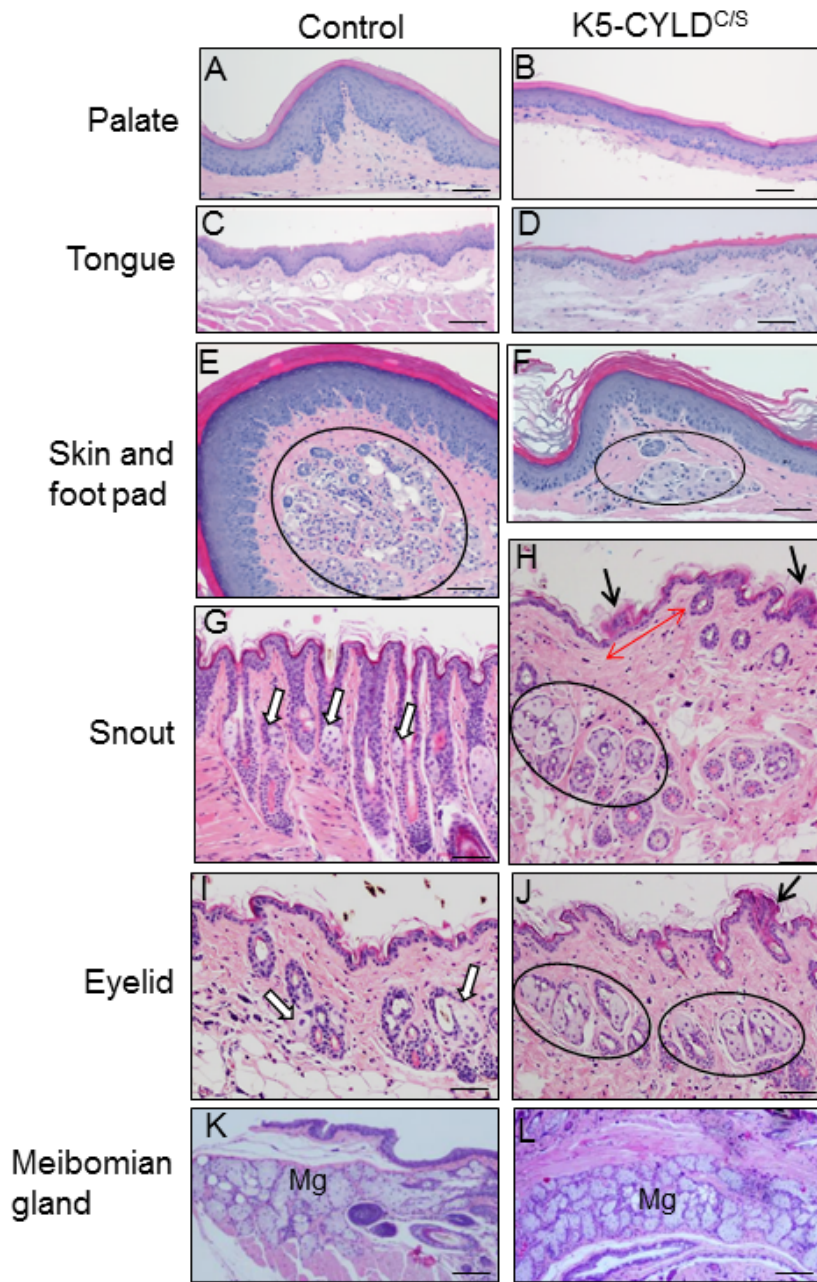

**Figure S4. Histological analysis showing the premature aging of different epithelia of the K5-CYLD<sup>C/S</sup> mice.** Sections from both Control (A, C, E, G, I, K) and transgenic mice (B, D, F, H, J, L) of 5- (G-J) and 20-month-old are shown. (A, B) Palate epithelium; note the atrophy in that of K5-CYLD<sup>C/S</sup> mice (B). (C, D) Stratified epithelium of the tongue. Note the thinning of the epithelium in transgenic mice (D). (E, F) Scarce eccrine glands in the hind limb foot pads of the K5-CYLD<sup>C/S</sup> mice are appreciated (circle). (G, H) Snout skin of 5-month-old mice. Highly abundant hyperplastic sebaceous glands are observed in the transgenic mice (circles in H); additionally, an atrophic epidermal area (double-headed red arrow) and epidermal ridges (black arrows) are shown. Eyelid skin of 5-month-old mice (I, J); note the presence of numerous hyperplastic sebaceous glands in the K5-CYLD<sup>C/S</sup> mice (enclosed in circles), in clear contrast with those found in the corresponding tissue of Control mice (I, white arrows). Also note the absence adipose tissue in the eyelid transgenic mice and the presence of epidermal ridges (J, black arrows). (K, L) Note the abundant hyperplastic Meibomian glands (Mg) found in the eyelids of K5-CYLD<sup>C/S</sup> mice (L) compared to those in Control mice (K). Images from 20-month-old mice are showed, although similar alterations are found in young transgenic mice (from 3 months-old). Scale bars: 250  $\mu$ m (A-F, K, L); 150  $\mu$ m (G, H) 230  $\mu$ m (I, J).

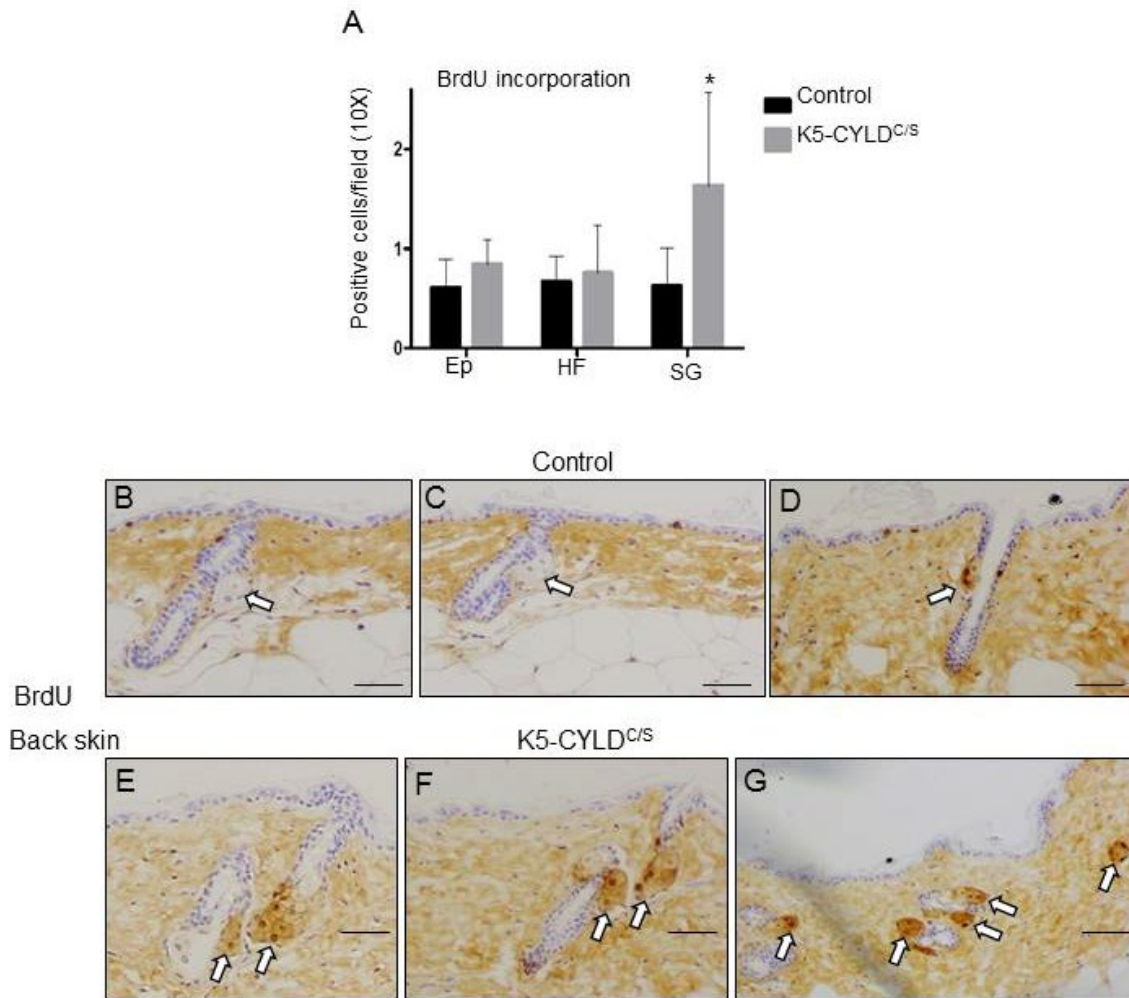

**Figure S5. BrdU analysis in the back skin of Control and K5-CYLD<sup>C/S</sup> mice.** (A) BrdU incorporation in the back skin of 1-year-old mice. Note the increased proliferation of the sebaceous glands from transgenic mice (4 Control and 5 transgenic mice were analyzed; error bars represent SEM; *P* value by Bonferroni multiple comparisons test: two-way ANOVA). *P*<0.05. (B-G) Representative image showing the BrdU staining in Control (B-D) and transgenic (E-G) sections of back skin. Observe the increased BrdU incorporation in the sebaceous glands of the K5-CYLD<sup>C/S</sup> mice. Scale bars: 150  $\mu$ m. Ep: epidermis; HF: hair follicles; SG: sebaceous glands.



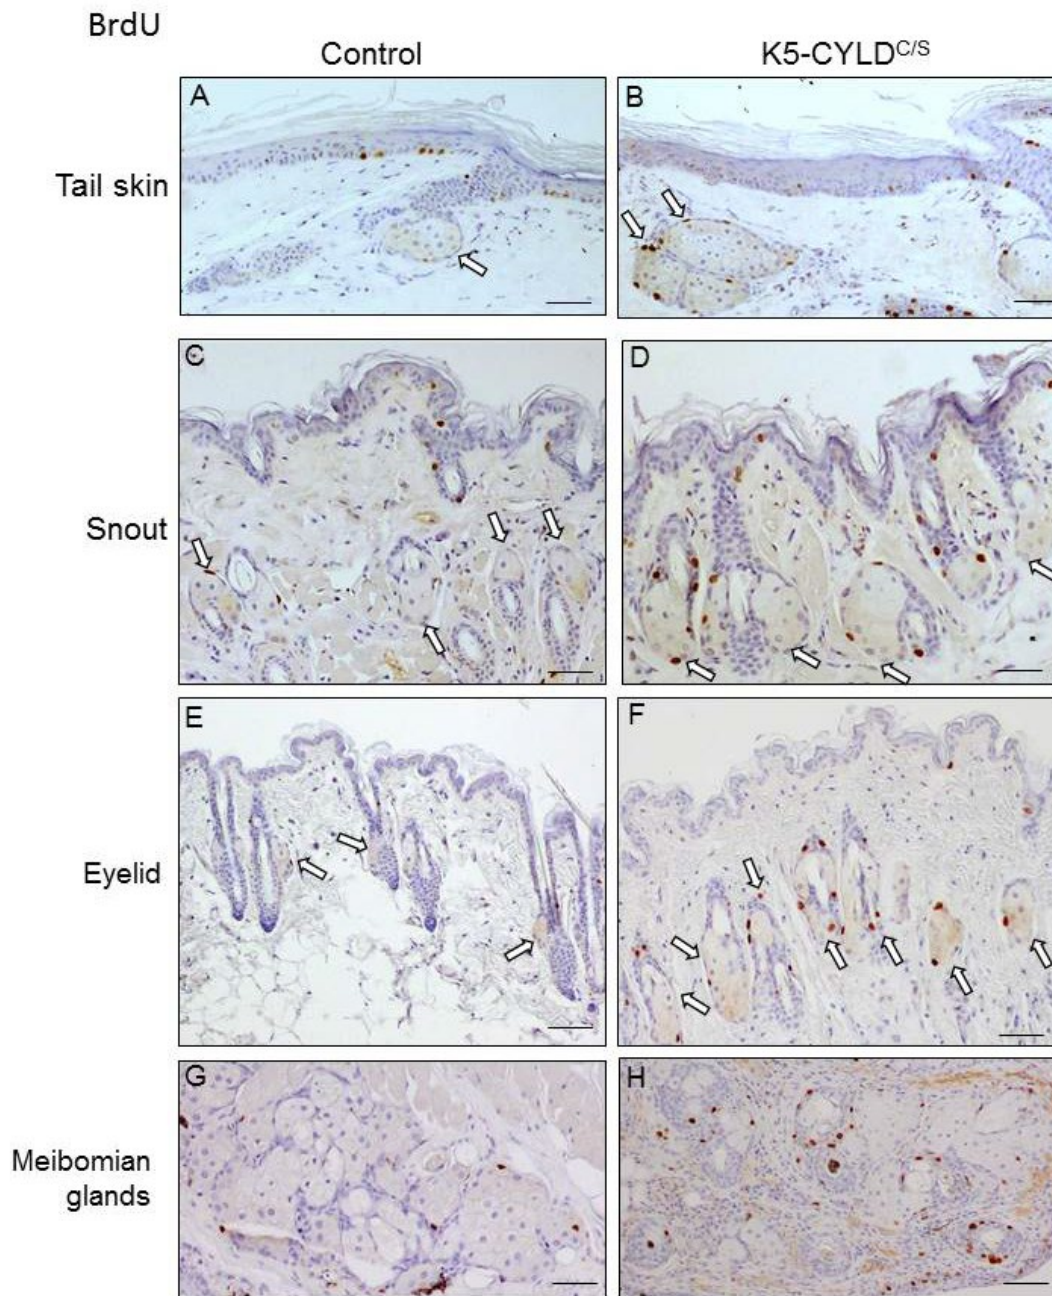

**Figure S6. BrdU incorporation in the skin of Control and K5-CYLD<sup>C/S</sup> mice.** BrdU staining in Control (A, C, E, G) and transgenic (B, D, F, H) sections showing increased signal in the hyperplastic sebaceous glands of the tail, snout and eyelid skin of the K5-CYLD<sup>C/S</sup> mice (B, D, F); as well as in the Meibomian glands (H) of the transgenic mice. White arrows point to sebaceous glands. Scale bars: 140  $\mu$ m (A-F); 110  $\mu$ m (G, H).

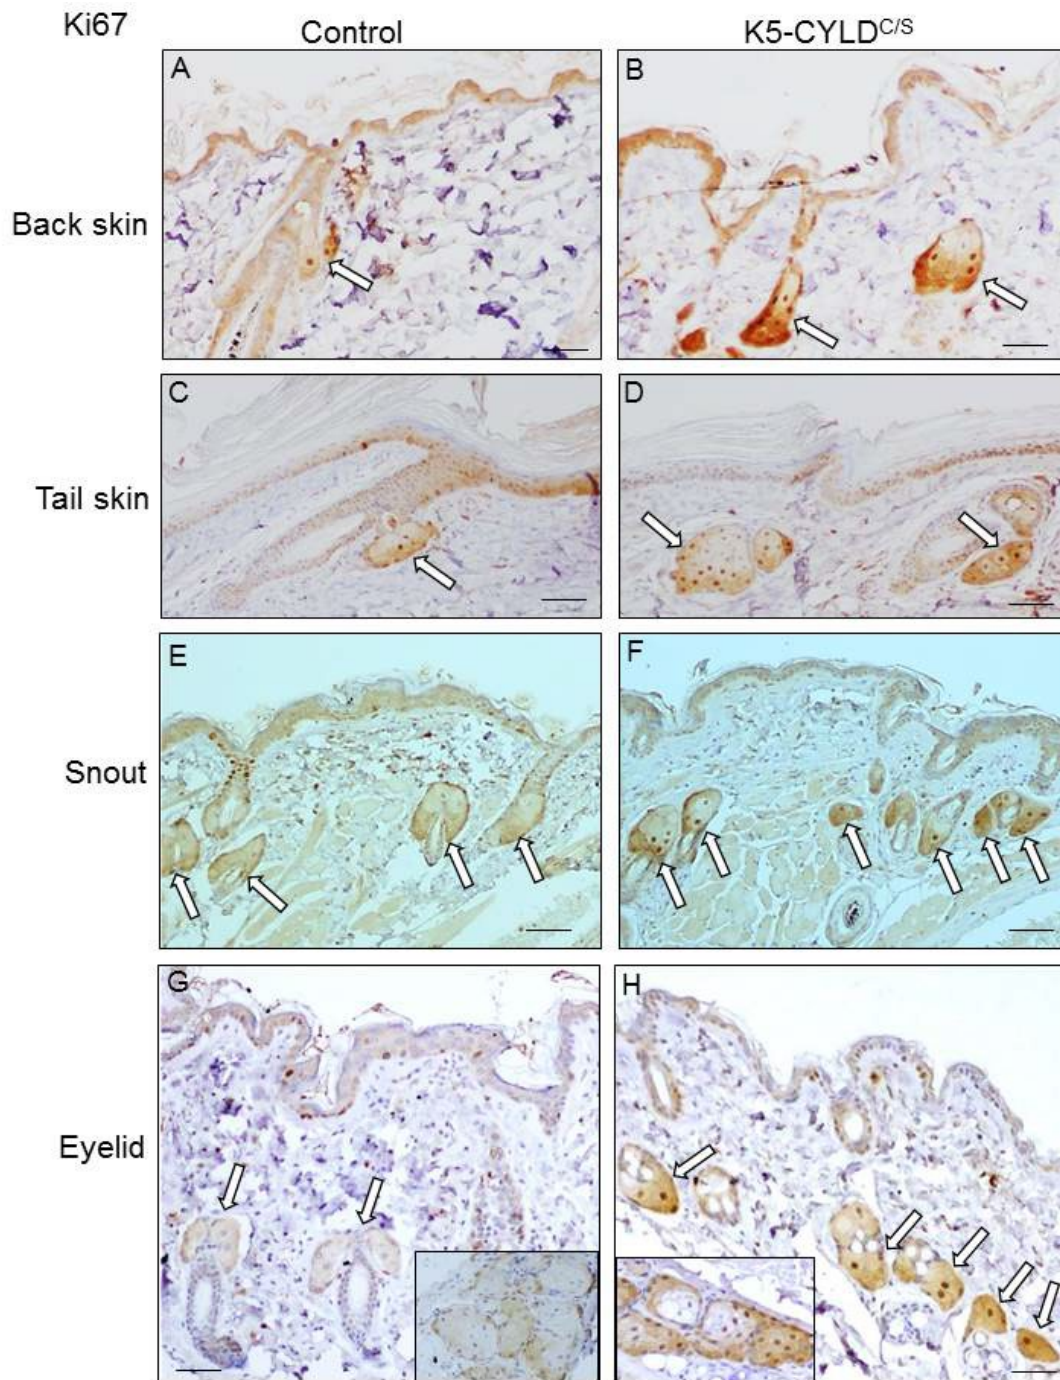

**Figure S7. Analysis of cell proliferation in the skin of Control and K5-CYLD<sup>C/S</sup> mice.** Ki67 staining in Control (A, C, E, G) and transgenic (B, D, F, H) sections showing increased signal in the hyperplastic sebaceous glands of the back, tail, snout and eyelid skin of transgenic mice. Also note that Meibomian glands of the K5-CYLD<sup>C/S</sup> mice are more proliferative than those of Control mice (compare insets in G and H). White arrows point to sebaceous glands. Scale bars: 160  $\mu$ m (A-F); 120  $\mu$ m (G, H).

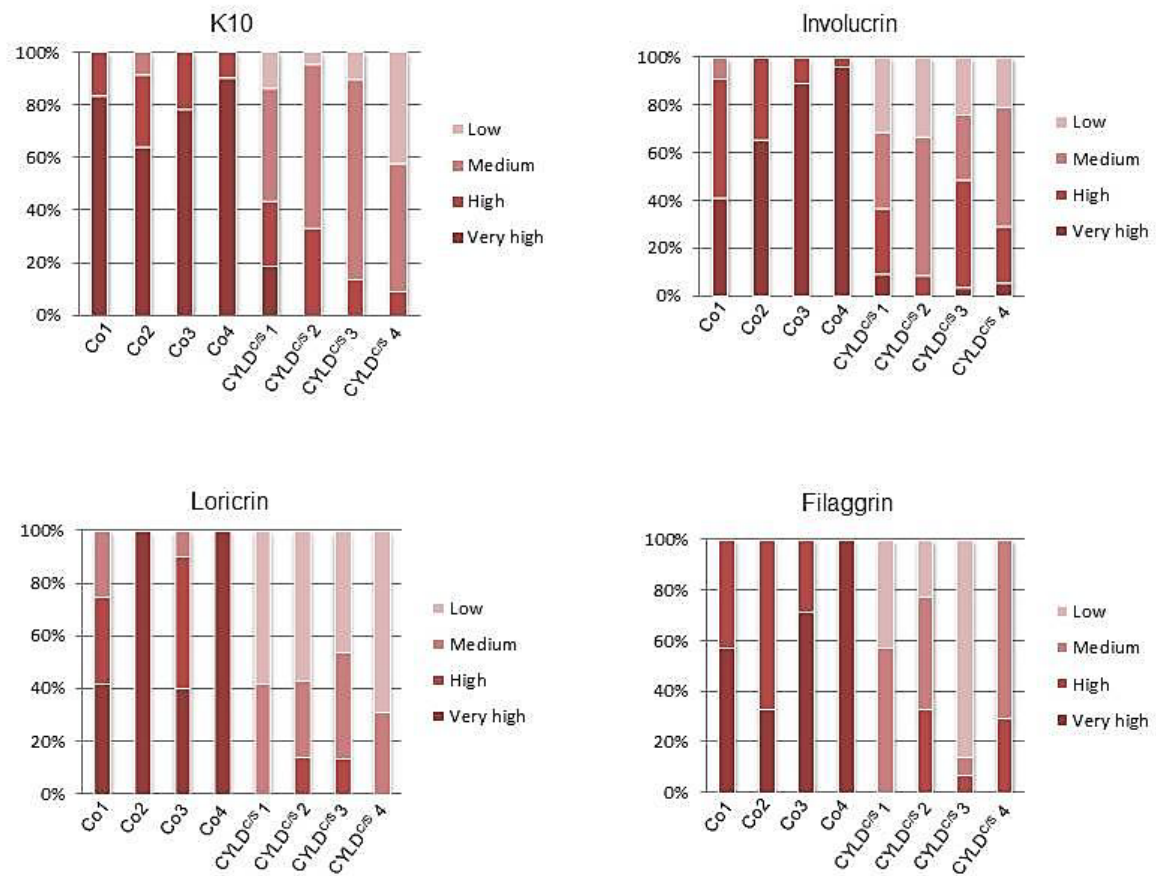

**Figure S8. Semiquantitative analysis of the intensity of the expression of epidermal differentiation markers in Control and K5-CYLD<sup>C/S</sup> mice.** 10-15 fields, 10X magnification, corresponding to K10, Involucrin, Loricrin and Filaggrin immunostainings were analyzed and quantified as very high, high, medium or low expression. Analysis of the expression in 4 animals per genotype and staining is showed. Co: Control animals; CYLD<sup>C/S</sup>: K5-CYLD<sup>C/S</sup> transgenic mice.



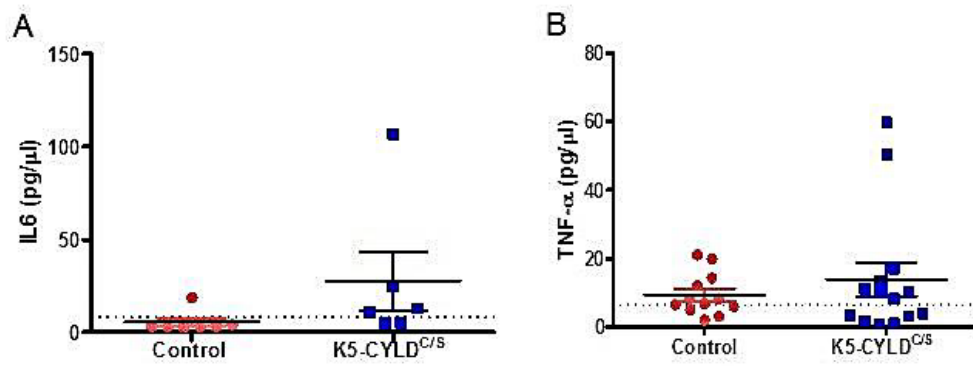

**Figure S9. Increased levels of IL6 and TNF- $\alpha$  in the serum of K5-CYLD<sup>C/S</sup> mice.** IL6 (A) and TNF- $\alpha$  (B) serum levels from 8 Control and 8 transgenic mice of both 16 and 22 months-old (i.e., a total of 16 control and 16 transgenic animals) were analyzed. Results show increased levels of both cytokines in the serum of transgenic mice, mainly of IL-6.

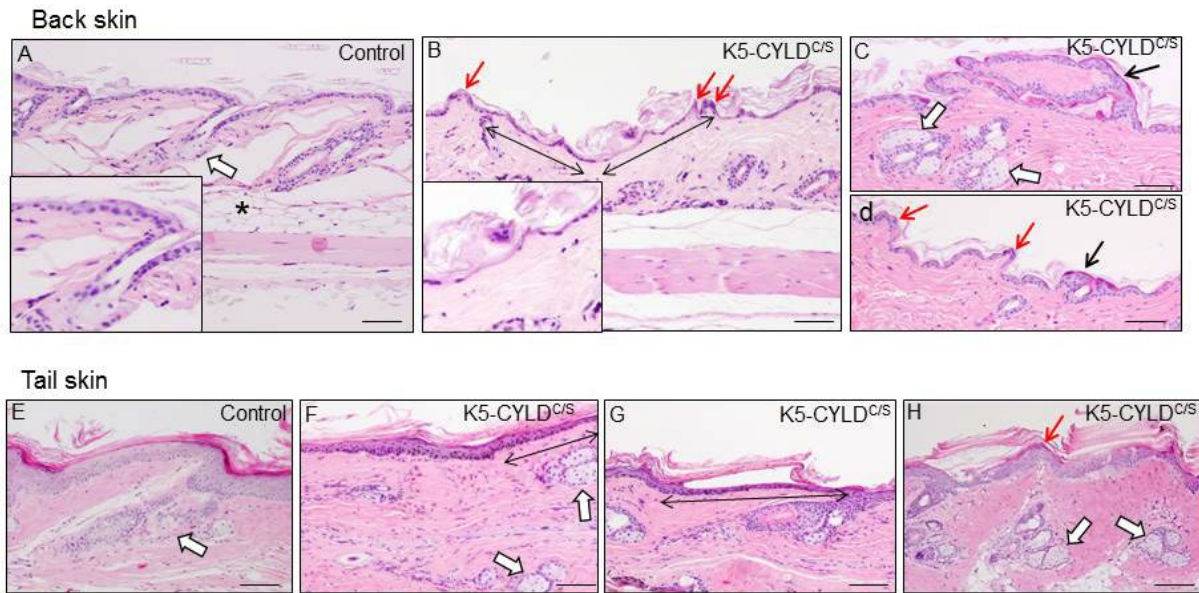

**Figure S10. Phenotypic alterations in the skin of FVB/N-K5-CYLD<sup>C/S</sup> mice indicating that premature aging signs are independent of their genetic background.** Representative images showing the main histological alterations presented by K5-CYLD<sup>C/S</sup> mice developed in a FVB/N genetic background (these are coincident with that observed in B6D2-transgenic mice). (A-D) Back skin sections from Control (A) and FVB/N-transgenic mice (B-D); (E-H) tail skin images from Control (E) and FVB/N-transgenic (F-H) mice. Observe areas of atrophy in the epidermis of the FVB/N-K5-CYLD<sup>C/S</sup> mice (double-headed arrows in B,F,G; compare inserts in A,B); epidermal ridges of pyknotic keratinocytes (red arrows in B,D,H); papillomatous hyperplasia (black arrows in C, D); hyperplastic and orphan sebaceous glands (white arrows in C,F,H) compared with normal-size sebaceous glands in Control (white arrows in A, E). Reduced number of hair follicles (C, F, H), and scarce adipose tissue (B) is observed in FVB/N-transgenic mice; asterisk in (A) indicates fat tissue in Control mice hypodermis. Five animals of each genotype (18-20-month-old) were analyzed. Scale bars: 250  $\mu$ m (A-D); 300  $\mu$ m (E-H).

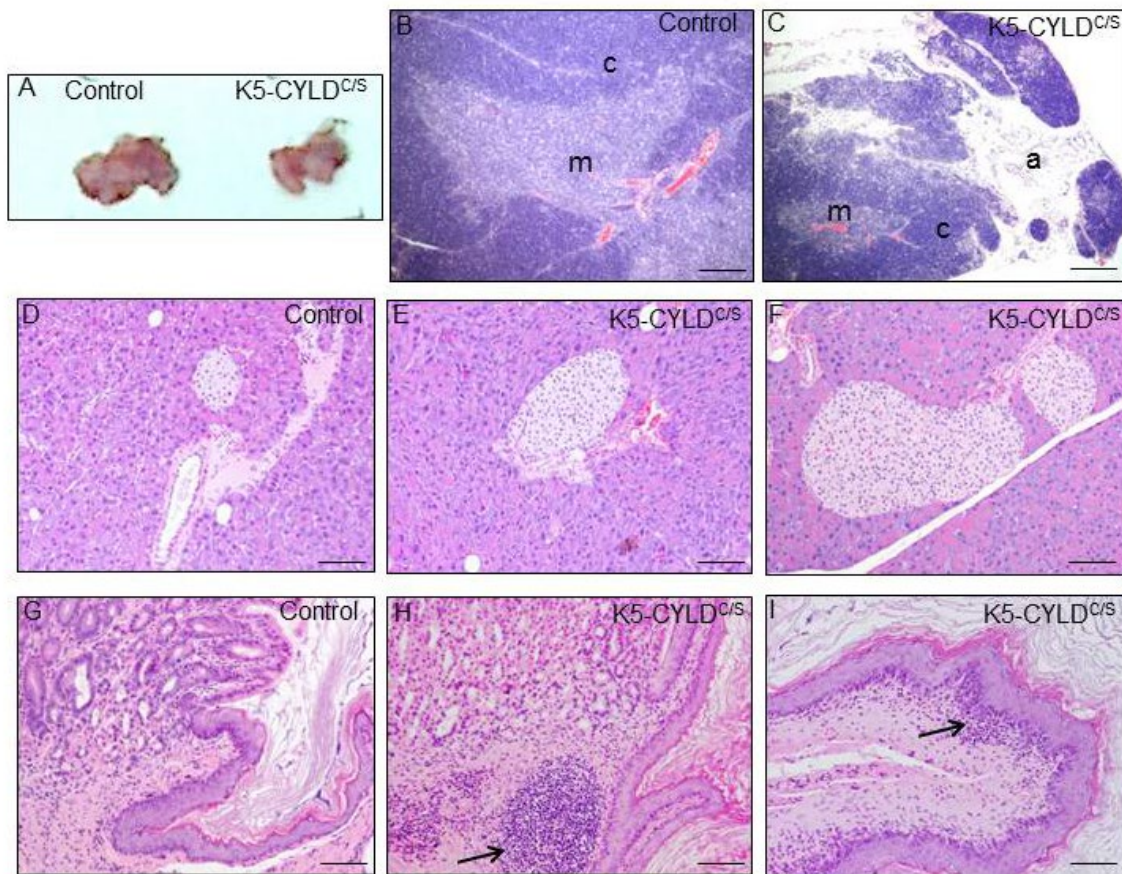

**Figure S11. Signs of premature aging in the thymus, pancreas and stomach of FVB/N-K5-CYLD<sup>C/S</sup> mice.** (A) Representative images showing the smaller size of the thymus of 3-month-old FVB/N-transgenic mice. (B, C) Thymic atrophy and infiltration of white adipose tissue (A) in the thymus of FVB/N-transgenic mice (C) compared to thymus of age-matched Control mice (b). Histopathologic analysis of pancreas (D-F) and stomach (G-I) from 18-month-old Control (D, G) and FVB/N-transgenic (E, F, H, I) mice. Note the hyperplasia of the Islets of Langerhans in the FVB/N-K5-CYLD<sup>C/S</sup> mice (E, F). (H, I) Representative images showing foci of inflammation in the stomach of FVB/N-transgenic mice (black arrows). Scale bars: 400  $\mu$ m (B, C); 200  $\mu$ m (D-F); 250  $\mu$ m (G-I).

**A FVB/N-K5-CYLD<sup>C/S</sup> mice develop spontaneous tumors**

| FVB/N Mouse genotype     | Lung ADC | Mammary ADC |
|--------------------------|----------|-------------|
| Control                  | 0/5      | 0/3*        |
| K5-CYLD <sup>C/S-X</sup> | 2/5      | 1/3*        |

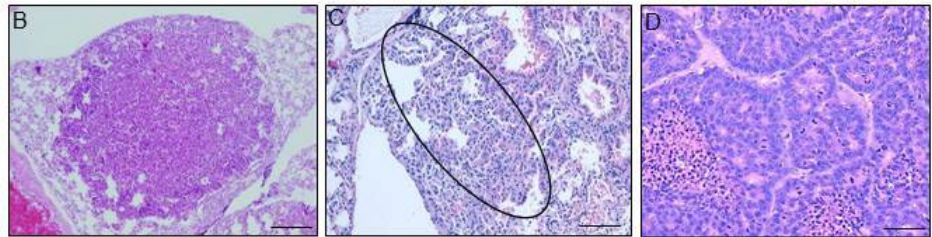

**Figure S12. K5-CYLD<sup>C/S</sup> mice develop spontaneous tumors independently of their genetic background.** Control and transgenic mice (FVB/N background) were analyzed (3 females and 2 males). (A) Lung and mammary adenocarcinomas were detected in aging FVB/N-K5-CYLD<sup>C/S</sup> mice. Number of animals that have developed each type of tumor, as well as the number of mice that have been analyzed is shown. (B) Image of lepidic lung adenocarcinoma developed in a FVB/-N-transgenic mouse. (C) Atypical adenomatous hyperplasia of lung in a FVB/N-K5-CYLD<sup>C/S</sup> mouse (circle). (D) Mammary adenocarcinoma of high grade in a female FVB/N-transgenic mouse. ADC: Adenocarcinoma; (\*): female mice. Scale bars: 500  $\mu$ m (A); 150  $\mu$ m (B, C).



**Table S1. Number of mice whose skin has been analyzed.**

| Genotype                 | Age (months) |     |     |     |     |      |         |         |
|--------------------------|--------------|-----|-----|-----|-----|------|---------|---------|
|                          | 1 m          | 3 m | 5 m | 8 m | 12m | 20 m | 21-24 m | 25-30 m |
| Control                  | 4            | 6   | 5   | 4   | 4   | 7    | 4       | 8       |
| K5-CYLD <sup>C/S-X</sup> | 4            | 6   | 5   | 4   | 5   | 10   | 3       | 9       |

The number of animals analyzed at the indicated months of age is showed.

**Table S2: Number of mice whose thymus has been analyzed.**

| Genotype                 | Age (months) |       |    |      |
|--------------------------|--------------|-------|----|------|
|                          | 1m           | 2.5 m | 3m | 3.5m |
| Control                  | 3            | 3     | 8  | 3    |
| K5-CYLD <sup>C/S-X</sup> | 3            | 3     | 8  | 3    |

The number of animals analyzed at the indicated months of age is showed.
